# Supplementary material for: Pomiar średnicy włókna optycznego z wykorzystaniem światła rozproszonego
Source: publisher site journal article supplement (doi:10.18632/aging.203000), 2009-01-01
Supplement: Supplementary file [file aging-v13i9-203000-supplementary-material-SD1.pdf]

SUPPLEMENTARY FIGURE

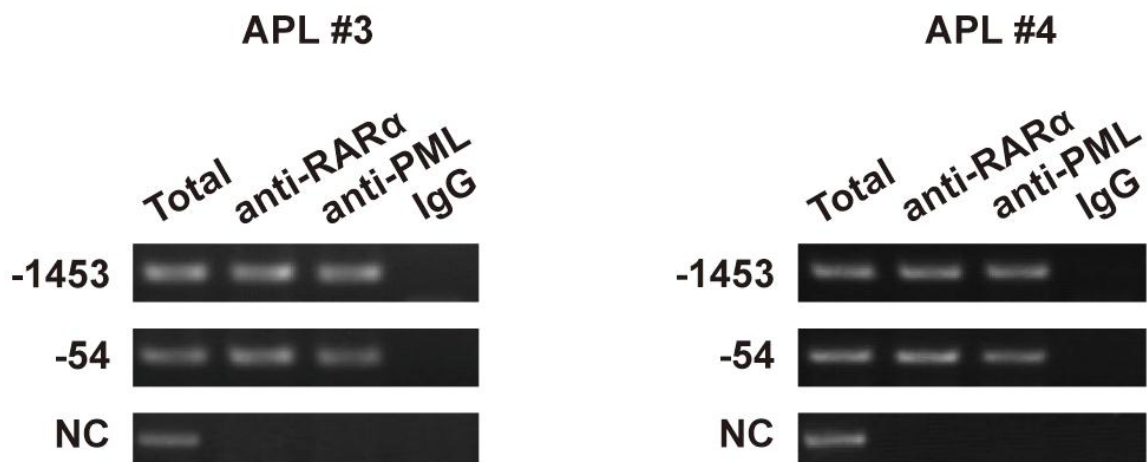

Supplementary Figure 1. ChIP assays were conducted in bone marrow cells from two APL patients with anti-PML, anti-RAR $\alpha$ , or nonspecific (IgG) antibodies. Total input and immunoprecipitated DNA were analyzed by PCR using primers around -1453 and -54 sites.
