# Supplementary material for: Pomiar średnicy włókna optycznego z wykorzystaniem światła rozproszonego
Source: publisher site journal article supplement (doi:10.18632/aging.203000), 2009-01-01
Supplement: Supplementary file [file aging-v13i9-203000-supplementary-material-SD2.pdf]

## SUPPLEMENTARY TABLES

**Supplementary Table 1. Predicted retinoic acid responsive elements (RAREs) nearby the -1453 and -54 sites.**

| Motif  | Sequence name | Strand | Start | End  | p-value    | Matched sequence          |
|--------|---------------|--------|-------|------|------------|---------------------------|
| V_DR11 | neat1promoter | -      | 80    | 102  | 0.0000165  | AGGTCAGGAGGCAGGAGAGGGAA   |
| V_DR6  | neat1promoter | -      | 85    | 102  | 0.0000418  | AGGTCAGGAGGCAGGAGA        |
| V_DR1  | neat1promoter | -      | 90    | 102  | 0.0000465  | AGGTCAGGAGGCA             |
| V_DR1  | neat1promoter | -      | 97    | 109  | 0.00000522 | GGGTCCCAGGTCA             |
| V_DR10 | neat1promoter | -      | 97    | 118  | 0.0000395  | AGCTCTGTGGGGTCCCAGGTCA    |
| V_DR1  | neat1promoter | -      | 150   | 162  | 0.0000102  | AGTTCACAGGTCA             |
| V_DR12 | neat1promoter | +      | 231   | 254  | 0.0000296  | AGTGCAGAGTCACGTGCCAGGGCA  |
| V_DR6  | neat1promoter | +      | 237   | 254  | 0.0000406  | GAGTCACGTGCCAGGGCA        |
| V_DR9  | neat1promoter | +      | 249   | 269  | 0.000034   | AGGGCACAGCAATCCCGGGCA     |
| V_DR5  | neat1promoter | -      | 339   | 355  | 0.0000906  | AGGTCACCACTCAGCCA         |
| V_DR13 | neat1promoter | -      | 350   | 374  | 0.0000421  | CCTTCAGGCCTCTGCCCTAAGGTCA |
| V_DR11 | neat1promoter | +      | 509   | 531  | 0.000027   | TGGTCACATGAGAGGTGGGGCA    |
| V_DR1  | neat1promoter | -      | ###   | 1025 | 0.0000781  | GGGTCACTGGTCT             |
| V_DR10 | neat1promoter | -      | ###   | 1041 | 0.0000959  | CGGCTATTGCCAATCAGGGTCA    |
| V_DR4  | neat1promoter | +      | ###   | 1121 | 0.000048   | AGGTCAAGGCAGGTGG          |
| V_DR13 | neat1promoter | +      | ###   | 1135 | 0.0000205  | AAGGCAGGTGGATCACTTGAGGTCA |
| V_DR4  | neat1promoter | +      | ###   | 1135 | 0.00000612 | GGATCACTTGAGGTCA          |
| V_DR10 | neat1promoter | -      | ###   | 1852 | 0.0000529  | AGGGCACTGTTTCAGAGGGTCC    |
| V_DR2  | neat1promoter | -      | ###   | 1860 | 0.0000216  | AGGACAAAAGGGCA            |
| V_DR13 | neat1promoter | +      | ###   | 2073 | 0.0000999  | AGTGCAGTGGCACAATCATAGCTCA |
| V_DR2  | neat1promoter | -      | ###   | 2240 | 0.0000824  | AGGCCAGGAGTTCG            |
| V_DR9  | neat1promoter | +      | ###   | 2784 | 0.0000132  | AGGTCAGATGACACACAGTCA     |
| V_DR8  | neat1promoter | +      | ###   | 2783 | 0.000045   | AGGTCAGATGACACACAGTC      |
| V_DR1  | neat1promoter | +      | ###   | 2776 | 0.0000547  | AGGTCAGATGACA             |
| V_DR4  | neat1promoter | +      | ###   | 3152 | 0.000084   | AGGGCTCAGGAGTTCA          |
| V_DR2  | neat1promoter | +      | ###   | 3152 | 0.0000285  | GGCTCAGGAGTTCA            |
| V_DR2  | neat1promoter | +      | ###   | 3160 | 0.0000886  | AGTTCACCAGGTTT            |
| V_DR13 | neat1promoter | -      | ###   | 3814 | 0.000012   | AGGTCACCACGCCAGCCGAGGCC   |
| V_DR3  | neat1promoter | -      | ###   | 3814 | 0.0000886  | AGGTCACCACGCCCA           |
| V_DR4  | neat1promoter | -      | ###   | 3824 | 0.00000555 | GGGTTCGCTTGAGGTCA         |
| V_DR8  | neat1promoter | -      | ###   | 4150 | 0.0000508  | GGGTCATTGCTCAACGGGAC      |
| V_DR1  | neat1promoter | -      | ###   | 4150 | 0.0000816  | GGGTCATTGCTCA             |
| V_DR3  | neat1promoter | -      | ###   | 4159 | 0.000015   | GCGTCACCGGGTCA            |

**Supplementary Table 2. Predicted retinoic acid responsive element half (RAREhalf) sites nearby the -1453 and -54 sites.**

| Motif | Sequence name  | Strand | Start | End  | p-value  | Matched sequence |
|-------|----------------|--------|-------|------|----------|------------------|
| 1     | neat1 promoter | -      | 97    | 102  | 0.000237 | AGGTCA           |
| 1     | neat1 promoter | -      | 150   | 155  | 0.000237 | AGGTCA           |
| 1     | neat1 promoter | -      | 214   | 219  | 0.000237 | AGGTCA           |
| 1     | neat1 promoter | -      | 350   | 355  | 0.000237 | AGGTCA           |
| 1     | neat1 promoter | -      | 970   | 975  | 0.000237 | AGGTCA           |
| 1     | neat1 promoter | -      | 3809  | 3814 | 0.000237 | AGGTCA           |
| 1     | neat1 promoter | +      | 1106  | 1111 | 0.000237 | AGGTCA           |
| 1     | neat1 promoter | +      | 1130  | 1135 | 0.000237 | AGGTCA           |
| 1     | neat1 promoter | +      | 2764  | 2769 | 0.000237 | AGGTCA           |
| 1     | neat1 promoter | -      | 1020  | 1025 | 0.000432 | GGGTCA           |
| 1     | neat1 promoter | -      | 4145  | 4150 | 0.000432 | GGGTCA           |
| 1     | neat1 promoter | +      | 3147  | 3152 | 0.000915 | AGTTCA           |

**Supplementary Table 3. Detailed information about APL patients.**

| Patient No. | Age at diagnosis (years) | Sex | Peripheral blood counts at diagnosis |          |                         | Blasts in BM(%) | Cytogenetics                   | Molecular markers |
|-------------|--------------------------|-----|--------------------------------------|----------|-------------------------|-----------------|--------------------------------|-------------------|
|             |                          |     | WBC ( $\times 10^9/L$ )              | HB (g/L) | PLT ( $\times 10^9/L$ ) |                 |                                |                   |
| 1           | 64                       | F   | 0.99                                 | 53       | 23                      | 81              | 46, XX, t(15;17)(q22;q21)[20]  | PML-RARa(+)       |
| 2           | 21                       | F   | 19.56                                | 105      | 55                      | 93              | 46, XX, t(15;17)[15]/46, XX[5] | PML-RARa(+)       |
| 3           | 48                       | M   | 1.91                                 | 71       | 16                      | 94.5            | 46, XY[20]                     | PML-RARa(+)       |
| 4           | 15                       | M   | 5.16                                 | 87       | 31                      | 91              | 46, XY, t(15;17)(q22;q21)[3]   | PML-RARa(+)       |

**Supplementary Table 4. Primers for RT-PCR and quantitative real-time RT-PCR.**

|                   | Sequence(5'→3')             | Amplicon length |
|-------------------|-----------------------------|-----------------|
| NEAT1-F           | CTTCCTCCCTTTAACTTATCCATTAC  | 116bp           |
| NEAT1-R           | CTCTTCCTCCACCATTACCAACAATAC |                 |
| NEAT1_2-F         | CAGTTAGTTTATCAGTTCTCCCATCCA | 139bp           |
| NEAT1_2-R         | GTTGTTGTCGTCACCTTTCAACTCT   |                 |
| C/EBP $\alpha$ -F | ACGATCAGTCCATCCCAGAG        | 122bp           |
| C/EBP $\alpha$ -R | TTCACATTGCACAAGGCACT        |                 |
| GAPDH-F           | GGAGCGAGATCCCTCCAAAAT       | 197bp           |
| GAPDH-R           | GGCTGTTGTCATACTTCTCATGG     |                 |

**Supplementary Table 5. Primers for plasmid construction.**

|                                  | Sequence(5'→3')                                               |
|----------------------------------|---------------------------------------------------------------|
| For wt                           |                                                               |
| NEAT PRO 1633-pGL3-F             | CGGGGTACCTTCCCTCTTTCCACACGGTTCT                               |
| NEAT PRO 1633-pGL3-R             | CCGCTCGAGCATCCCTCCCTGTCGCTAACTC                               |
| For trunc1                       |                                                               |
| NEAT PRO 1368-pGL3-F             | CGGGGTACCTGCCTGCTGATACCACCTCAC                                |
| NEAT PRO 1633-pGL3-R             | CCGCTCGAGCATCCCTCCCTGTCGCTAACTC                               |
| For trunc2                       |                                                               |
| NEAT PRO 1633-pGL3-F             | CGGGGTACCTTCCCTCTTTCCACACGGTTCT                               |
| NEAT PRO 243-pGL3-R              | CCGCTCGAGGCGAATGCCATGAGGAAGAAGA                               |
| For mut1                         |                                                               |
| 1453 mut-sense                   | 5'-CAGCACAGAAGGTGGTGATGTGGGTCGCCAGGCTTGCTC                    |
| 1453 mut-antisense               | 5'-GAGCAAGCCTGGGCGACCCACATCACCACCTTCTGTGCTG                   |
| For mut2                         |                                                               |
| 54 mut-sense                     | 5'-GTGGAGGAATCGTCCCGTTGAGGTCTGACCCCGGTGACGC                   |
| 54 mut-antisense                 | 5'-GCGTCACCGGGGTCAGACCTCAACGGGACGATTCTCCAC                    |
| For -54F                         |                                                               |
| -54F-F                           | CGGGGTACCTGGAGGAATCGTCCCGTTGAG                                |
| NEAT PRO 1633-pGL3-R             | CCGCTCGAGCATCCCTCCCTGTCGCTAACTC                               |
| For -1453F                       |                                                               |
| -1453F-F                         | CGGGGTACCCTCTTTCCACACGGTTCTTTC                                |
| -1453F-R                         | CCGCTCGAGTCTGTGAGGTGGTATCAGCAG                                |
| For pcDNA3.1-C/EBP $\alpha$      |                                                               |
| pcDNA3.1-C/EBP $\alpha$ -F       | CGCGGATCCATGGAGTCGGCCGACTTCTAC                                |
| pcDNA3.1-C/EBP $\alpha$ -R       | CCGGAATTCTCACGCGCAGTTGCCCATG                                  |
| For pLVX_shC/EBP $\alpha$        |                                                               |
| pLVX_shC/EBP $\alpha$ _sense     | GATCCGCCGGTACTCGTTGCTGTTCTTCAAGAGAGAACAGCAACGAGTACCGGTTTTTTTG |
| pLVX_shC/EBP $\alpha$ _antisense | AATTCAAAAAACCGGTAAGTCTGTTCTCTTGAAGAACAGCAACGAGTACCGGCG        |
| pLVX-NC-sense                    | GATCCGAGCGTGTAGCTAGCAGAGGTTCAAGAGACCTCTGCTAGCTACACGCTTTTTTTTG |
| pLVX-NC-antisense                | AATTCAAAAAAAGCGTGTAGCTAGCAGAGGTTCTTGAACCTCTGCTAGCTACACGCCG    |
